# Supplementary material for: Immobilization of Wnt Fragment Peptides on Magnetic Nanoparticles or Synthetic Surfaces Regulate Wnt Signaling Kinetics
Source: MDPI journal article supplement (doi:10.3390/ijms231710164), 2022-09-05
Supplement: s1 [file s1]

## Supplementary material

# Immobilization of Wnt Fragment Peptides on Magnetic Nanoparticles or Synthetic Surfaces Regulate Wnt Signaling Kinetics

Bin Hu <sup>1,2,†</sup>, Michael Rotherham <sup>3,\*,†</sup>, Neil Farrow <sup>1</sup>, Paul Roach <sup>1,4</sup>, Jon Dobson <sup>5,‡</sup> and Alicia J. El Haj <sup>1,3,\*,‡</sup>

<sup>1</sup> School of Pharmacy and Bioengineering, Keele University, Guy Hilton Research Center, Thornburrow Drive, Hartshill, Stoke-on-trent, Staffordshire, ST4 7QB, UK

<sup>2</sup> CAS Key Laboratory for Biomedical Effects of Nanomaterials and Nanosafety & CAS Center for Excellence in Nanoscience, National Center for Nanoscience and Technology, Beijing 100190, China

<sup>3</sup> Healthcare Technologies Institute, School of Chemical Engineering, Heritage Building, Mindelsohn Way, University of Birmingham, Birmingham, B15 2TH, UK.

<sup>4</sup> Department of Chemistry, Loughborough University, Loughborough, Leicestershire, LE11 3TU, UK

<sup>5</sup> J Crayton Pruitt Family Department of Biomedical Engineering, University of Florida, Gainesville, Florida 32611, USA

\* Correspondence: m.rotherham@bham.ac.uk (M.R.); A.ElHaj@bham.ac.uk (A.J.E.H.); Tel. (A.J.E.H.): +44 0121-371-8001

† B.H. and M.R. are joint first authors

‡ J.D. and A.J.E.H are joint senior authors

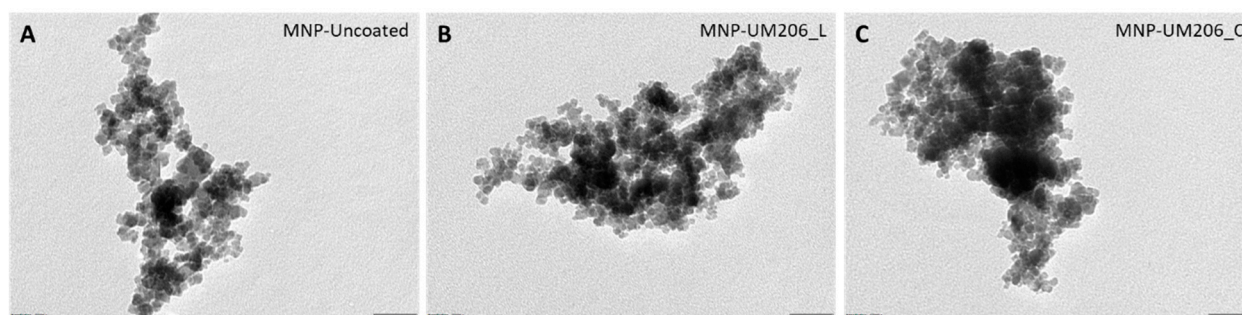

**Supplementary Figure S1:** Transmission electron micrographs of Blank-MNP (MNP-Uncoated) (a), 10 $\mu$ g-Linear-UM206 coated MNP (MNP-UM206\_L) (b) and 10 $\mu$ g-Cyclic-UM206 coated MNP (MNP-UM206\_C) (c), magnification is 270k, bar represents 50 nm.

### MNP FT-IR spectra

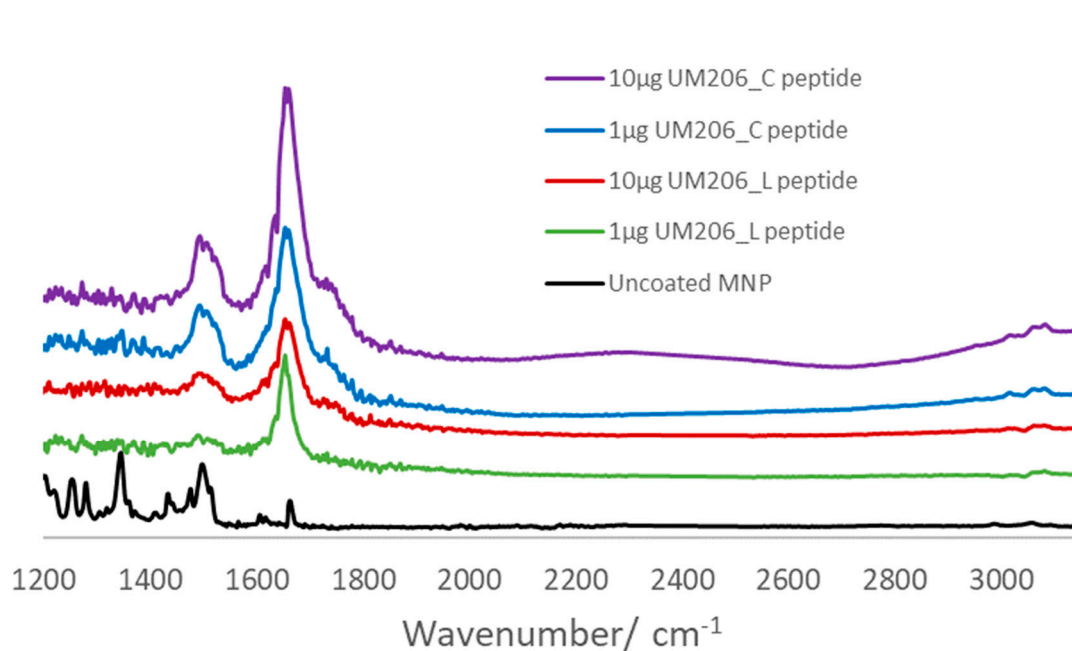

**Supplementary Figure S2:** FT-IR spectra of Control MNP (Uncoated MNP) (**Black**), 1μg-Linear-UM206 coated MNP (1μg UM206\_L peptide) (**Green**), 10μg-Linear-UM206 coated MNP (10μg UM206\_L peptide) (**Red**), 1μg-Cyclic-UM206 coated MNP (1μg UM206\_C peptide) (**Blue**) and 10μg-Cyclic-UM206 coated MNP (10μg UM206\_C peptide) (**Purple**). Absorbance peaks at ~1660cm<sup>-1</sup>, corresponding to amide I C=O stretch, ~1500cm<sup>-1</sup> corresponding to amide II N-H bending and a minor peak around ~3000cm<sup>-1</sup>, corresponding to C-H stretch were all present, especially in the coated MNP groups. Spectra represent an average of 256 scans at a resolution of 4 cm<sup>-1</sup>.

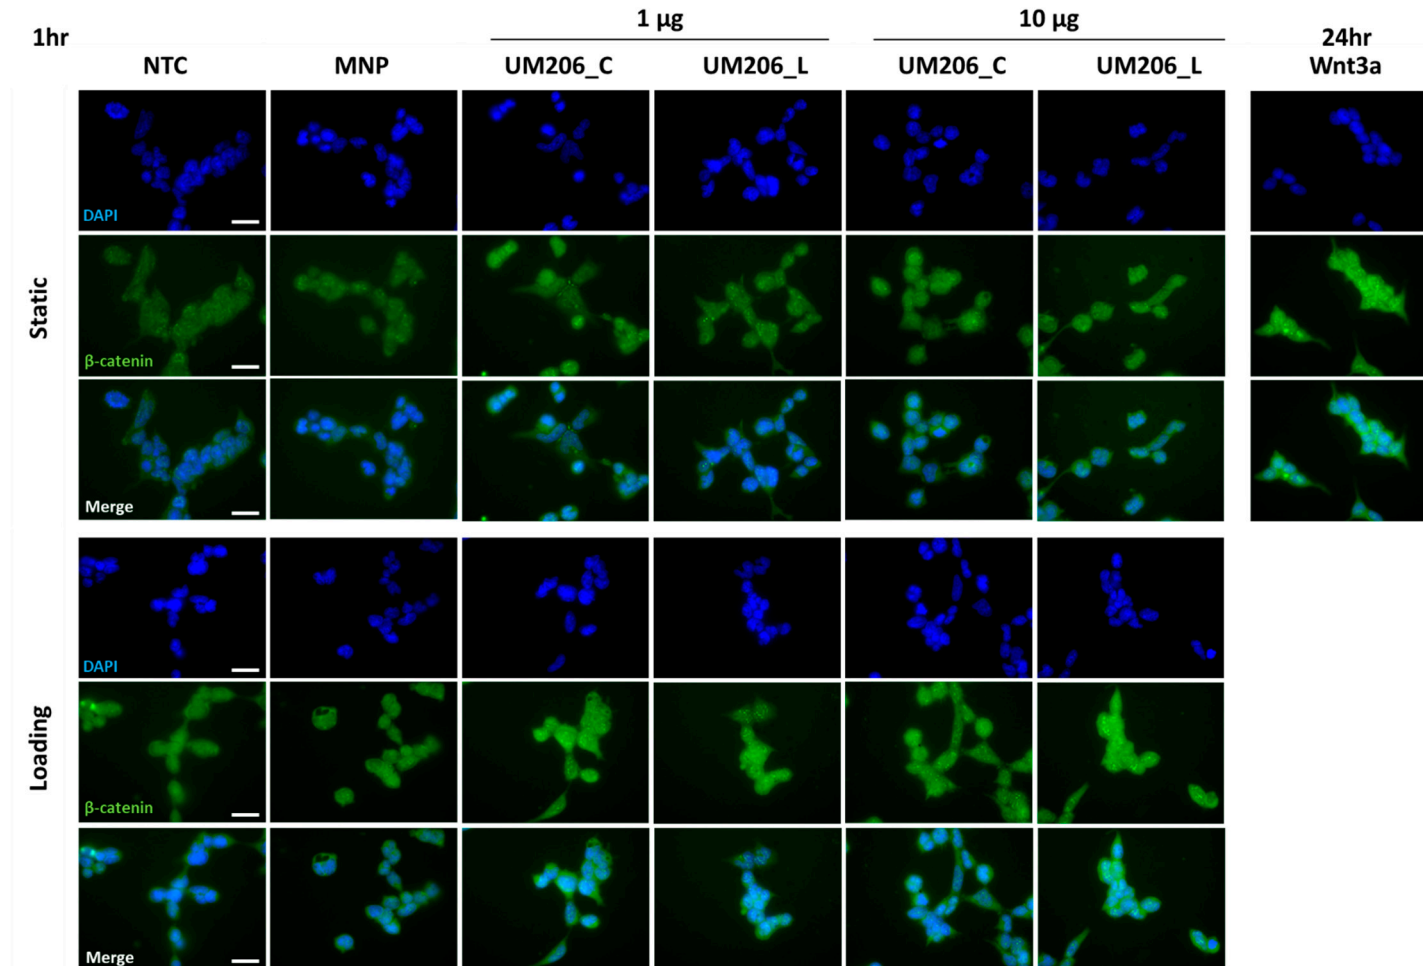

**Supplementary Figure S3:** Immunofluorescent images of active  $\beta$ -catenin in response to UM206 functionalised MNP after 1h treatment. A base level of active  $\beta$ -catenin was observed in the non-treated control (NTC) and uncoated MNP (MNP) with or without loading with MFB. A mild increase in active  $\beta$ -catenin was observed in response to static UM206\_C and UM206\_L with either 1  $\mu$ g or 10  $\mu$ g coating (top row). In contrast a clear increase in active  $\beta$ -catenin which was also mobilised to the nucleus was observed in response to the positive control Wnt3a after 24h. A similarly increased level of nuclear mobilised active  $\beta$ -catenin was also observed in cells treated with UM206\_C and UM206\_L with either 1  $\mu$ g or 10  $\mu$ g coating when loaded for 1h with MFB (bottom row). Representative images of n=3 shown. Scale bar represents 50  $\mu$ m.
